# Supplementary material for: T cell costimulation blockade blunts pressure overload-induced heart failure
Source: PubMed Central journal article supplement (PMC5343521; doi:10.1038/ncomms14680), 2017-03-06
Supplement: ncomms14680-s1.pdf [file ncomms14680-s1.pdf]

**a**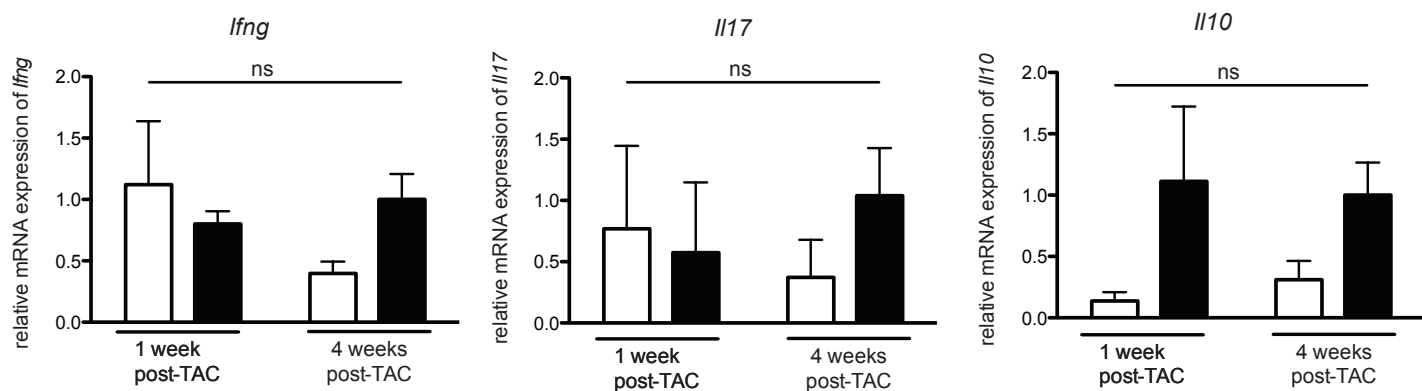**b****IL-6 / CD3e linear regression**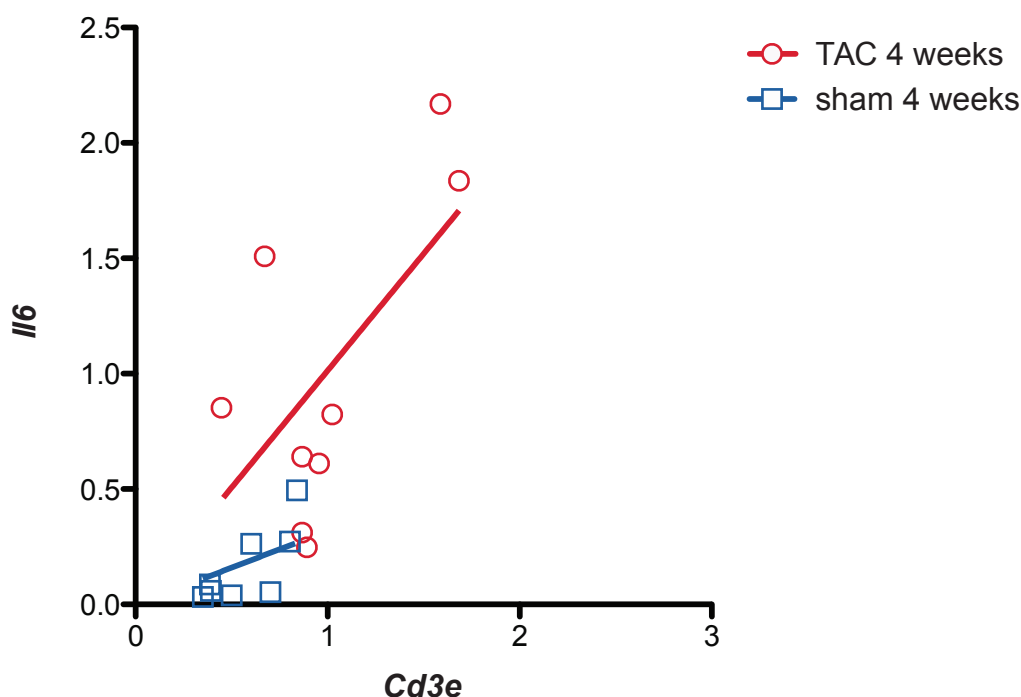**Supplementary Figure 1**

**(a) Characterization of the inflammatory signature in hypertrophic left ventricle of mice.** Gene expression analysis (TaqMan real-time qPCR) of mediators of inflammation within the left ventricle of C57BL6/J mice. Relative mRNA expression in sham-operated control mice (white bars) and TAC-operated mice (black bars) at 1 and 4 weeks after surgery, internally normalized to 18s rRNA expression. *Ifng*, *Il17* and *Il10*. Values are mean  $\pm$  SEM (n=7-9). Two-way ANOVA, Bonferroni post-test; ns, not significant. **(b) Linear regression of IL-6 and CD3e mRNA expression in left ventricles of TAC and sham-operated mice.** red circles and line: Linear regression between *Cd3e* and *Il6* expression in left ventricle of C57BL6/J TAC-operated mice 4 weeks after operation (n=9). Linear regression test; p value = 0.0002. blue squares and line: Linear regression between *Cd3e* and *Il6* expression in left ventricle of C57BL6/J sham-operated mice 4 weeks after operation (n=7). Linear regression test; p value = 0.0037.

## Exercise-trained mice

a

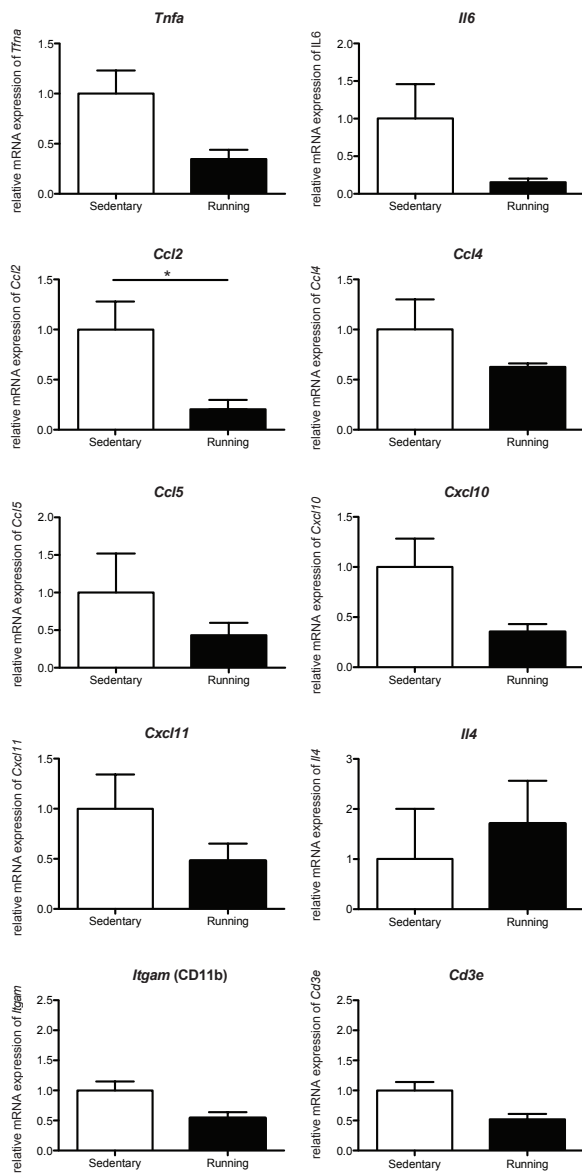

## AKT-transgenic mice

b

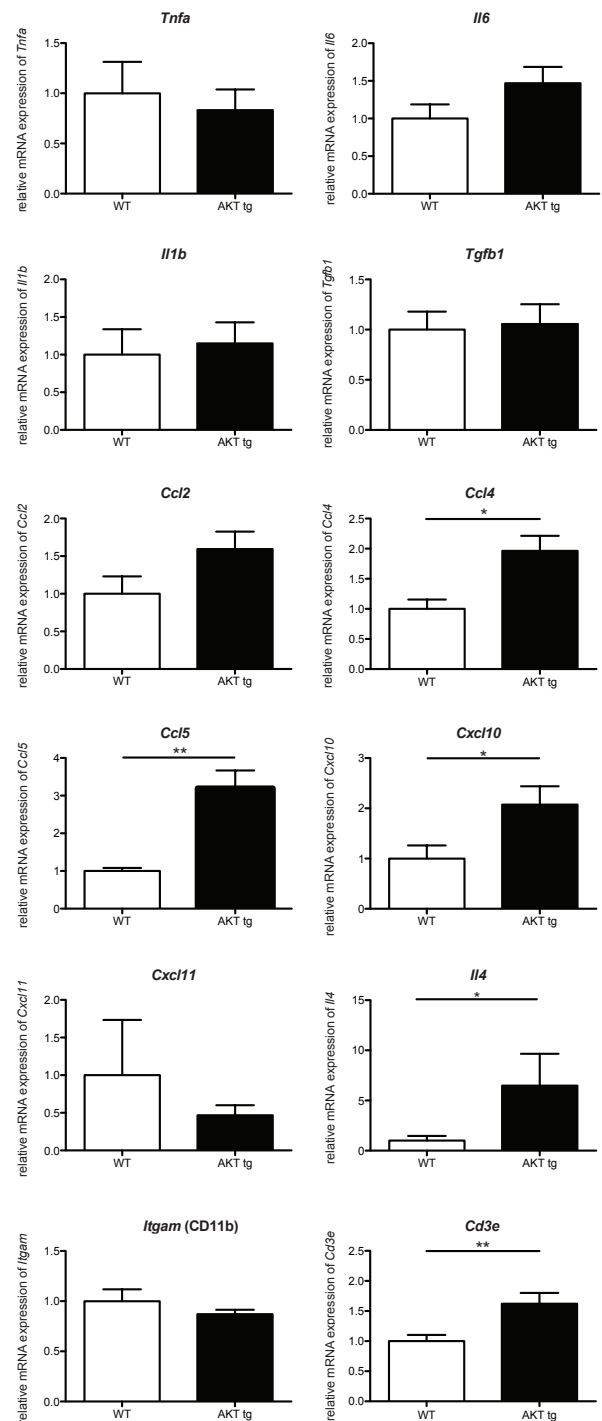

## Supplementary Figure 2

**Immune mediators in models of physiological hypertrophy (a)** Gene expression analysis of mediators of inflammation in the left ventricle of exercise-trained mice (running) compared to sedentary mice (sedentary). Bars show relative mean mRNA expression, internally normalized to 18s rRNA expression. The expression of *Tnfa*, *Il6*, *Ccl4*, *Ccl5*, *Cxcl10*, *Cxcl11*, *Il4*, *Itgam* (CD11b), or *Cd3e* did not change significantly, whilst *Ccl2* significantly decreased in the trained mice group. Values are mean  $\pm$  SEM (n=3). Unpaired t-test: \*, p-value <0.05. **(b)** Gene expression analysis of inflammatory mediators by TaqMan real-time qPCR in the left ventricle of 8-week-old Akt transgenic mice (Akt-Tg, white) (n=6) compared to wild-type mice (WT, black) (n=7). Bars show relative mean mRNA expression internally normalized to 18s rRNA expression. The relative expression of *Tnfa*, *Il6*, *Il1b*, *Tgfb1*, *Ccl2*, *Cxcl11*, and the innate cell marker *Itgam* (CD11b) did not increase, whilst *Ccl4*, *Ccl5*, *Cxcl10*, *Il4*, and *Cd3e* increased significantly. Values are indicated as mean  $\pm$  SEM. Mann-Whitney test: \*, p-value <0.05; \*\*, p-value <0.01.

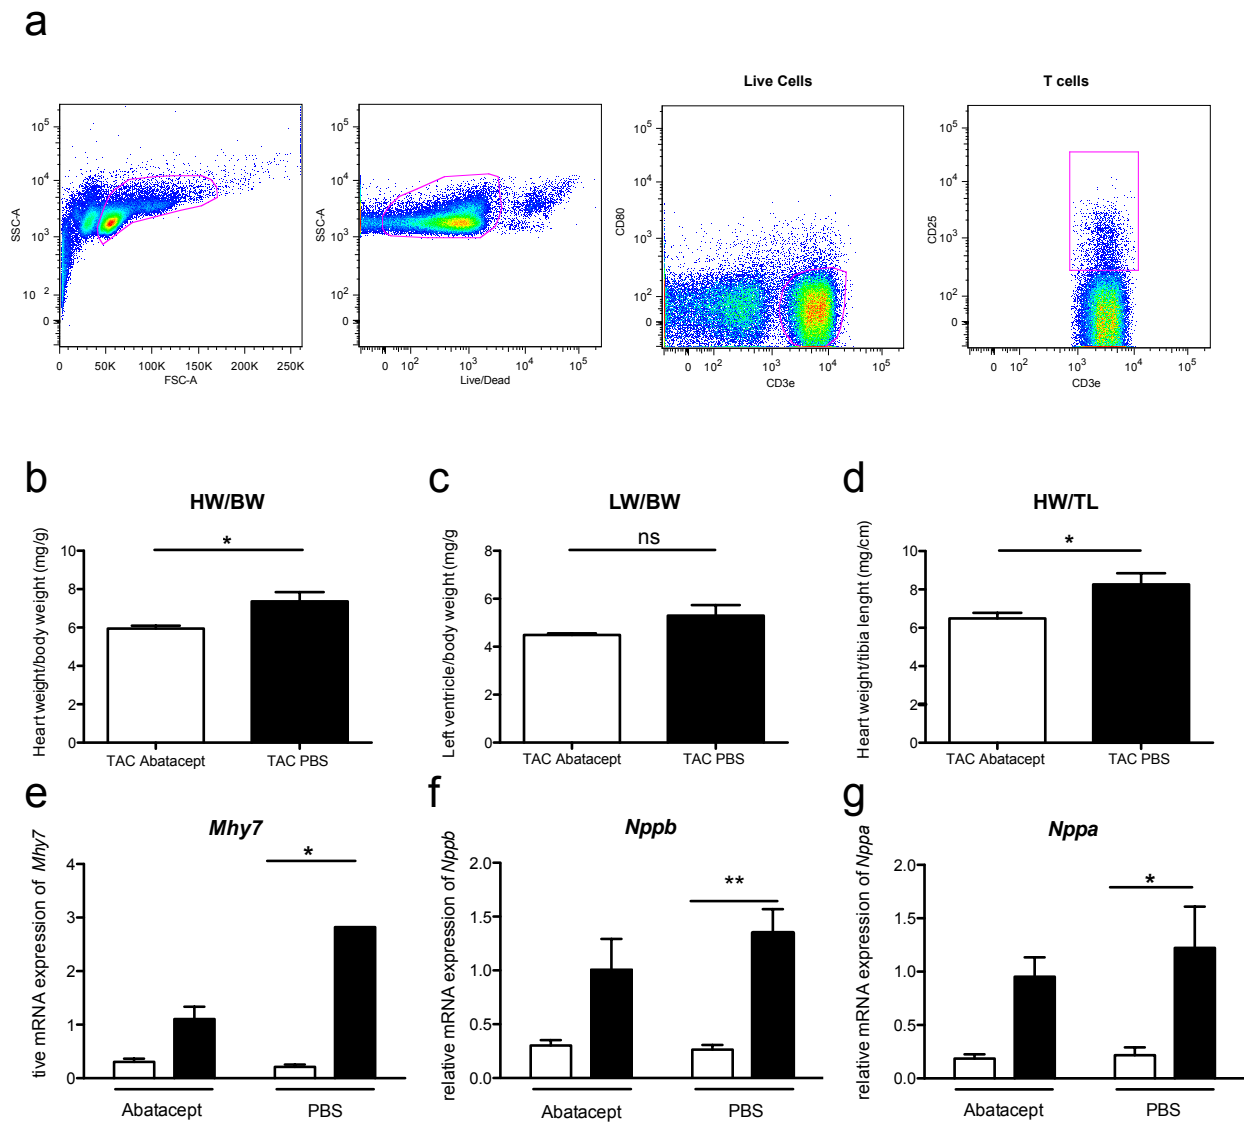

### Supplementary Figure 3

**Gating strategy for FACS analysis of T cell activation.** (a) Cells were gated on forward and side scatter, and dead cells were excluded. The CD80<sup>+</sup> population corresponded to autofluorescent cells, and hence was excluded. CD3e-expressing cells were selected and CD25 expression was assessed. **Progression of cardiac hypertrophy is limited by abatacept.** (b) Heart weight body weight (mg/g), (c) left ventricle body weight (mg/g), (d) heart weight tibia length (mg/cm) ratios in TAC-operated mice treated with abatacept or PBS, 4 weeks post operation. Values are indicated as mean  $\pm$  SEM (n=5-7). Unpaired t-test: \*, p-value <0.05. Relative gene expression by real-time qPCR internally normalized to 18S for genes expressing (e)  $\beta$ -myosin (*Mhy7*), (f) brain natriuretic peptide (*Nppb*) and (g) atrial natriuretic factor (*Nppa*) in the same mice. Values are mean  $\pm$  SEM (n=4-7). Two-way ANOVA with Bonferroni post-test; \*, p-value <0.05; \*\*, p-value <0.01.

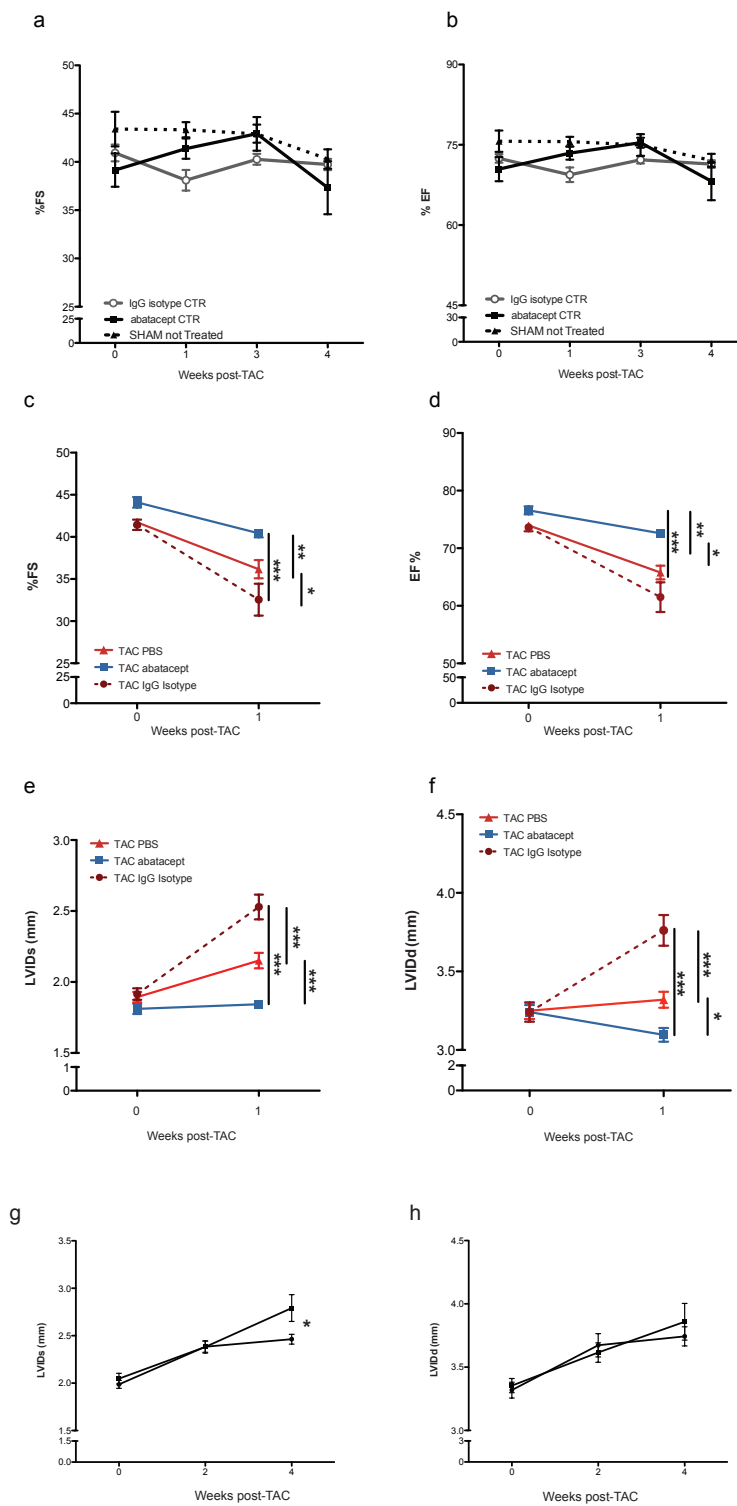

## Supplementary Figure 4

**Heart functionality is unchanged in non-operated mice after abatacept or human IgG isotype treatment. (a)** Fractional shortening (%FS) and **(b)** ejection fraction (%EF) in non-operated mice treated with abatacept or human IgG isotype control, or sham-operated, non-treated mice (included for comparison). Values are mean  $\pm$  SEM (n=3–4). Two-way ANOVA with Bonferroni post-test; no significant differences observed. **(c)** Fractional shortening (%FS), **(d)** ejection fraction (%EF), **(e)** left ventricle internal dimension in systole (LVIDs) and **(f)** left ventricle internal dimension in diastole (LVIDd) in TAC-operated mice treated with abatacept, PBS or human IgG isotype control for 1 week starting 2 days after operation. Values are mean  $\pm$  SEM (n=6–9). Two-way ANOVA with Bonferroni post-test; \*, p value <0.05; \*\*, p value <0.01; \*\*\*, p value <0.001. **(g)** left ventricle internal dimension in systole (LVIDs) and **(h)** left ventricle internal dimension in diastole (LVIDd) in TAC-operated mice treated with abatacept or PBS for 2 weeks starting 2 weeks after operation. Values are mean  $\pm$  SEM (n=7–9). Two-way ANOVA with Bonferroni post-test; \*, p value <0.05.

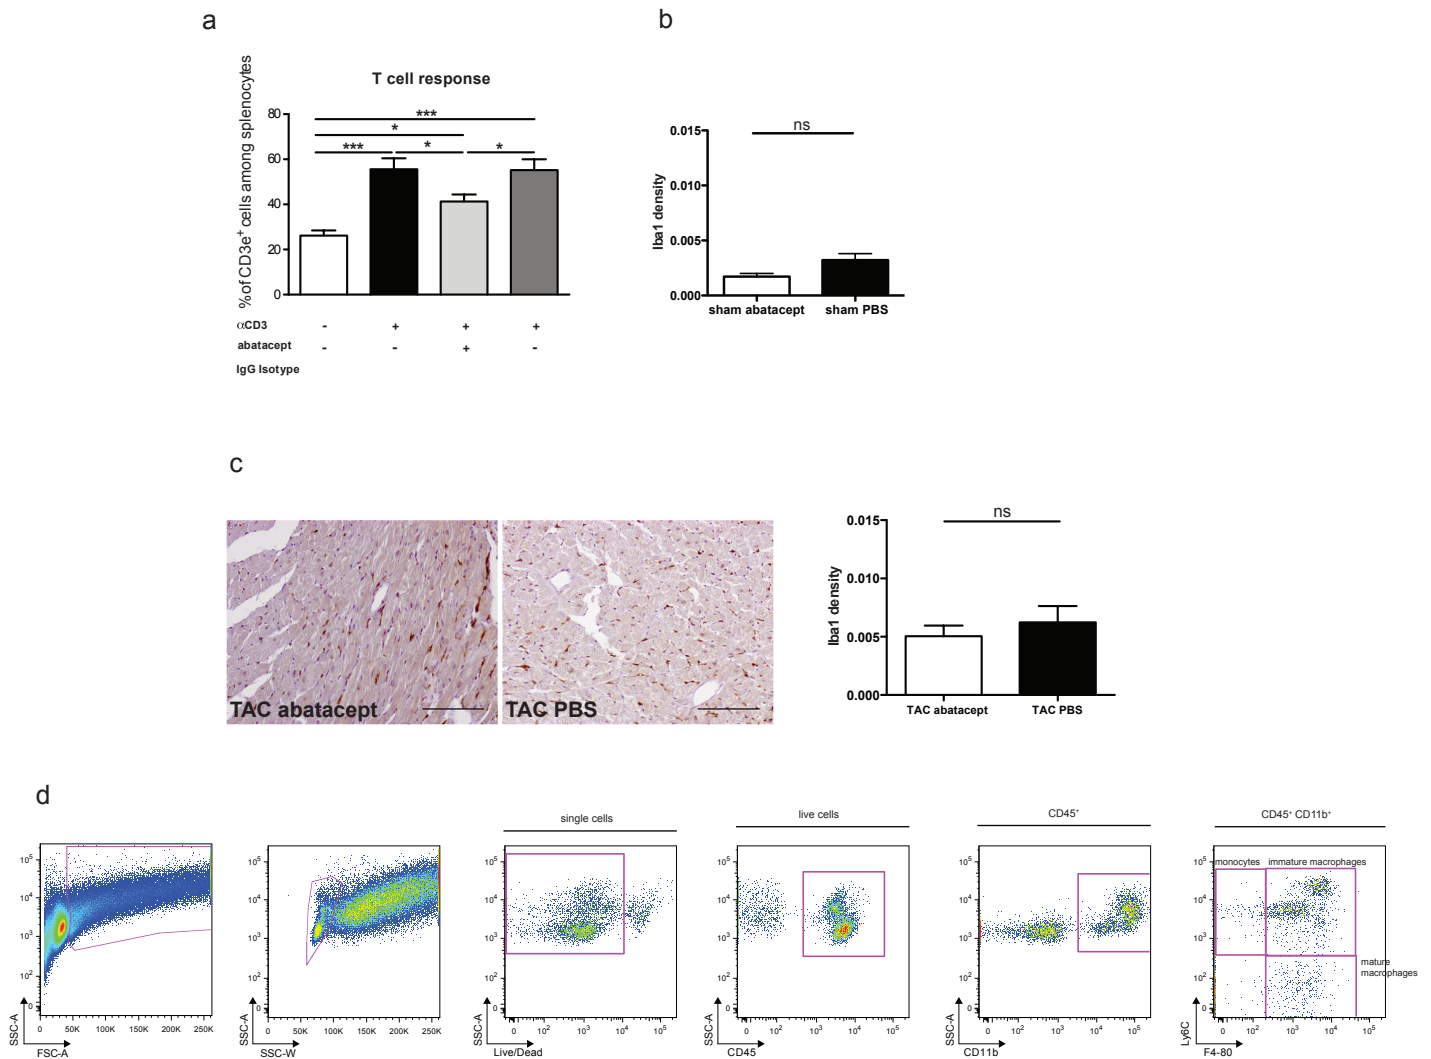

## Supplementary Figure 5

**Abatacept attenuates T cell responses *in vitro*** (a) Total splenocytes of 8 week-old C57BL/6J mice activated with anti-CD3 and cultured with 20 $\mu$ g/ml abatacept or IgG isotype control for 72 hours were analyzed by FACS for CD3e expression. Bars show mean  $\pm$  SEM of 4 independent experiments (n=4). One way-ANOVA repeated measures test with Tukey's post-test; \*, p-value <0.05; \*\*\*, p-value <0.001. (b) Statistical analysis of AIF-1(Iba1) immunohistochemical staining in left ventricles of sham-operated mice injected with abatacept (white bar) or PBS (black bar) at 4 weeks post-operation. AIF-1 density plotted as mean  $\pm$  SEM. Unpaired t-test. (n=2). (c) Representative images and statistical analysis of AIF-1 immunohistochemical staining (brown coloration; original magnification 20X; scale bar = 100  $\mu$ m) in left ventricles of TAC mice at 4 weeks post-operation, treated with abatacept or PBS. AIF-1 density plotted as mean  $\pm$  SEM; TAC abatacept (white bars); TAC PBS (black bars). Unpaired t-test. (n=2). (d) Gating strategy for flow cytometry analysis of cardiac single cell suspensions from TAC operated mice 1 week after operation, corresponding to data in Fig. 4d,e. Cells were gated based on forward and side scatter, doublets were excluded and live single cells were gated. CD45 and CD11b-expressing cells were selected and identified on the basis of Ly6C and F4-80 expression: Ly6C<sup>+</sup> F4-80<sup>-</sup> monocytes, Ly6C<sup>+</sup> F4-80<sup>+</sup> immature macrophages and Ly6C<sup>-</sup> F4-80<sup>+</sup> mature macrophages.

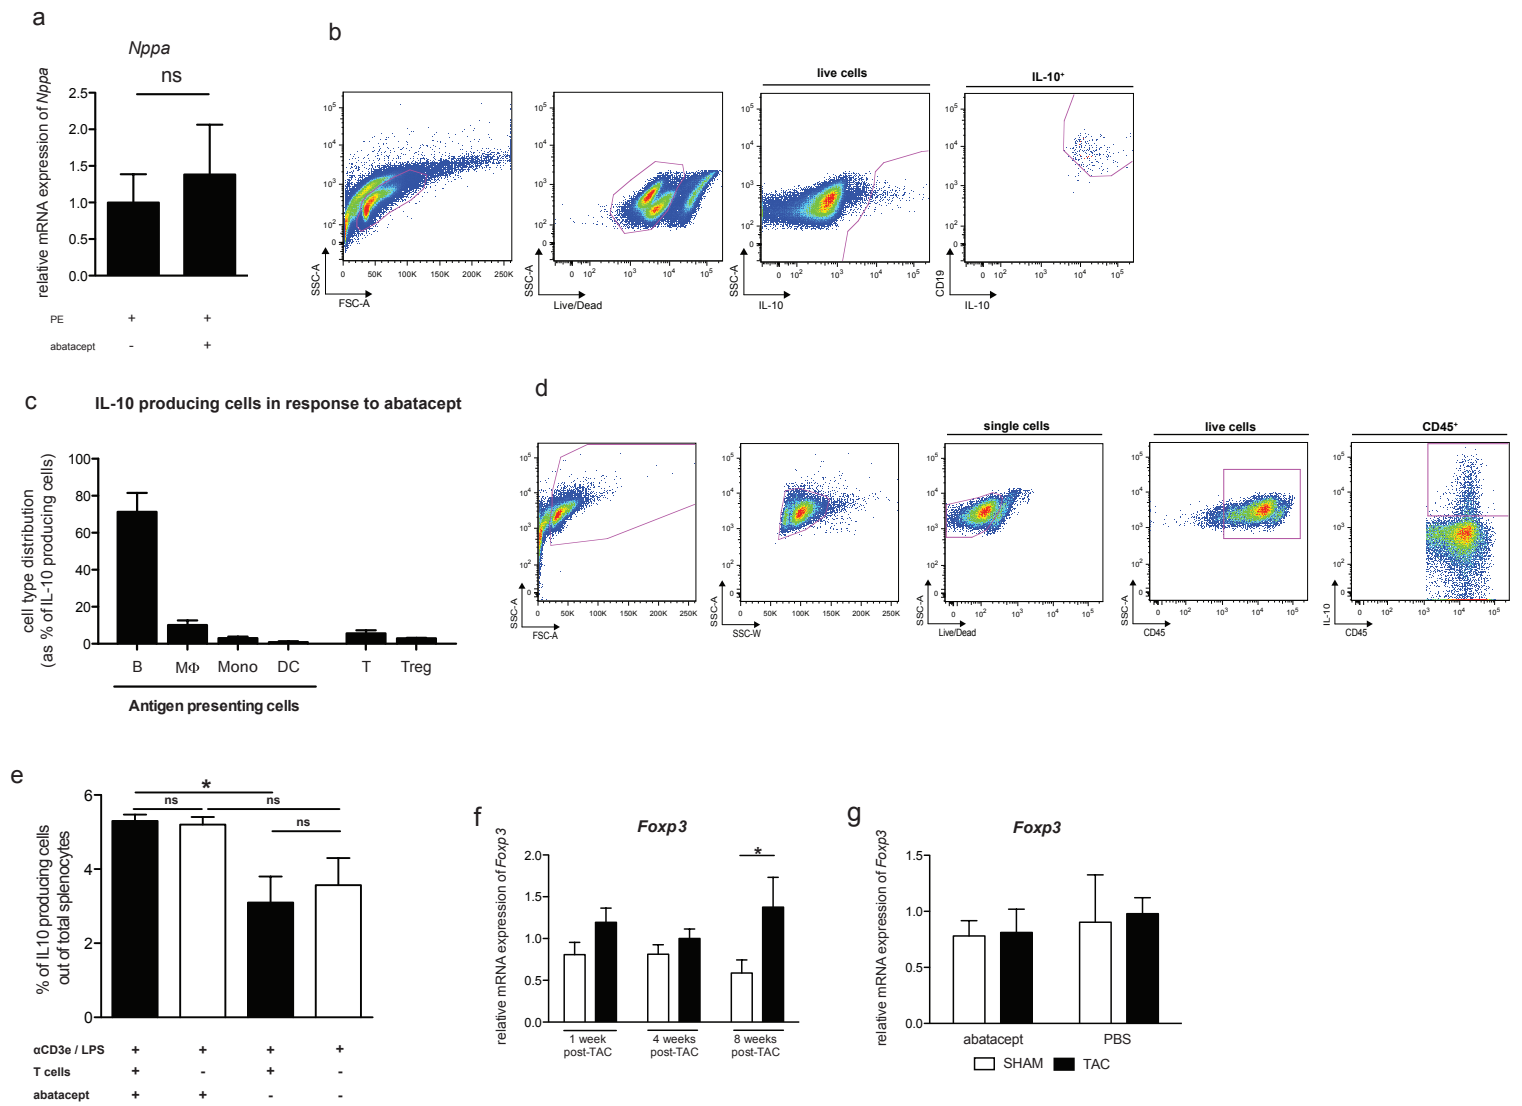

## Supplementary Figure 6

**(a) Evaluation of direct effects of abatacept on cardiomyocytes.** Real-time qPCR of *Nppa*, in mouse neonatal cardiomyocytes cultured with 100  $\mu$ M of phenylephrine (PE) and 20 $\mu$ g/ml of abatacept for 48 hours. Bars show mean  $\pm$  SEM of relative mRNA expression, internally normalized to 18s rRNA (n=6). Unpaired t-test; ns, not significant. **Abatacept induces *in vitro* production of IL-10** **(b)** Gating strategy for FACS analysis of IL-10 producing cells in presence of abatacept. Cells were gated based on forward and side scatter, dead cells were excluded and IL-10 producing cells were gated. Specific population frequencies were then analyzed (CD19<sup>+</sup> B cells, CD11c<sup>+</sup> dendritic cells, CD11b<sup>+</sup> monocytes and myeloid-derived cells, F4/80<sup>+</sup> macrophages, CD3e<sup>+</sup> T cells, and CD3e<sup>+</sup> Foxp3<sup>+</sup> Treg cells). **(c)** Total splenocytes of 8 week-old C57BL/6J mice activated with anti-CD3 and cultured with 20 $\mu$ g/ml abatacept were analyzed to identify the cellular source of IL-10 production, gated as in (b). Mean  $\pm$  SEM of 3 independent experiments (n=3). **(d)** Gating strategy for FACS analysis of IL-10 producing leukocytes in response to abatacept. Cells were gated based on forward and side scatter, doublets and dead cells were excluded. CD45<sup>+</sup> cells were identified and CD45<sup>+</sup> IL-10-producing cells were assessed. **(e)** Total splenocytes or T cell-depleted splenocytes of 8 week-old C57BL/6J mice were activated with 2 $\mu$ g/ml anti-CD3 and 5  $\mu$ g/ml of LPS. After 48 hours in culture with or without 20 $\mu$ g/ml abatacept were analyzed by flow cytometry for IL-10 production. Bars show mean  $\pm$  SEM of 3 independent experiments (n=3) of the percentage of IL10 producing cells out of total splenocytes. Two-way ANOVA with Bonferroni post-test; \*, p-value <0.05. **Presence of regulatory T cells in TAC- and sham-operated mice. (f)** Real-time qPCR for *Foxp3* in the left ventricle of C57BL6/J mice, 1, 4, and 8 weeks after TAC or sham operation. Bars show mRNA expression internally normalized to 18s rRNA expression. Mean  $\pm$  SEM (n=7–9). Two-way ANOVA with Bonferroni post-test; \*, p-value <0.05. **(g)** Real-time qPCR for *Foxp3* for the same samples as in Fig. 4f. Bars show mRNA expression internally normalized to 18s rRNA expression. Mean  $\pm$  SEM (n=7–9). Two-way ANOVA with Bonferroni post-test; ns, not significant.

## SHAM

## TAC

|                              | Basal<br>(n=3) | 1 week<br>post-<br>sham<br>(n=3) | 3 weeks<br>post-<br>sham<br>(n=3) | 4 weeks<br>post-<br>sham<br>(n=3) | Basal<br>(n=7) | 1 week<br>post-TAC<br>(n=7) | 3 weeks<br>post-TAC<br>(n=7) | 4 weeks<br>post-TAC<br>(n=7) |
|------------------------------|----------------|----------------------------------|-----------------------------------|-----------------------------------|----------------|-----------------------------|------------------------------|------------------------------|
| <b>Age (wks)</b>             | 8.7±0.0        | 9.6±0.1                          | 11.7±0.1                          | 12.6±0.0                          | 8.6±0.1        | 9.6±0.1                     | 11.6±0.1                     | 12.6±0.0                     |
| <b>Weight(g)</b>             | 22.0±1.0       | 22.4±0.8                         | 23.6±0.9                          | 23.9±1.1                          | 22.8±1.6       | 22.3±1.3                    | 24.0±1.5                     | 24.6±1.5                     |
| <b>HR M - mode<br/>(bpm)</b> | 545.7±71.1     | 507.7±93.9                       | 549.7±66.0                        | 598.0±29.0                        | 577.0±66.4     | 530.1±48.7                  | 517.9±87.1                   | 606.0±36.6                   |
| <b>% FS</b>                  | 43.4±3.1       | 43.3±1.4                         | 42.9±3.0                          | 40.3±1.7                          | 40.5±2.4       | 37.7±1.2 <sup>‡</sup>       | 33.2±1.5 <sup>‡§</sup>       | 30.6±2.2 <sup>‡§</sup>       |
| <b>% EF</b>                  | 75.7±3.5       | 75.6±1.5                         | 75.0±3.5                          | 72.1±2.1                          | 72.3±3.6       | 69.0±1.6 <sup>‡</sup>       | 62.7±2.1 <sup>‡§</sup>       | 58.8±3.5 <sup>‡§</sup>       |
| <b>LVIDd (mm)</b>            | 3.4±0.1        | 3.4±0.1                          | 3.5±0.1                           | 3.4±0.0                           | 3.4±0.1        | 3.4±0.2                     | 3.7±0.1 <sup>*◇</sup>        | 3.7±0.3 <sup>‡</sup>         |
| <b>LVIDs (mm)</b>            | 1.9±0.1        | 1.9±0.1                          | 2.0±0.2                           | 2.0±0.1                           | 2.0±0.2        | 2.1±0.1 <sup>*</sup>        | 2.5±0.1 <sup>‡</sup>         | 2.6±0.3 <sup>*‡</sup>        |
| <b>IVSd (mm)</b>             | 0.7 ± 0.0      | 0.8 ± 0.1                        | 0.7±0.1                           | 0.8±0.1                           | 0.7±0.0        | 0.9±0.1 <sup>*‡</sup>       | 0.9±0.1 <sup>*‡</sup>        | 1.0±0.1 <sup>#‡</sup>        |
| <b>IVSs (mm)</b>             | 1.1±0.1        | 1.2±0.0                          | 1.2±0.1                           | 1.2±0.1                           | 1.2±0.1        | 1.3±0.1 <sup>‡</sup>        | 1.3±0.1 <sup>*◇</sup>        | 1.4±0.1 <sup>*◇</sup>        |
| <b>LVPWd (mm)</b>            | 0.7±0.1        | 0.8±0.0                          | 0.8±0.1                           | 0.8±0.1                           | 0.8±0.1        | 0.9±0.1                     | 0.9±0.1 <sup>#‡</sup>        | 0.9±0.1 <sup>‡</sup>         |
| <b>LVPWs (mm)</b>            | 1.2±0.1        | 1.3±0.0                          | 1.2±0.1                           | 1.2±0.1                           | 1.2±0.1        | 1.3±0.1                     | 1.3±0.1 <sup>*◇</sup>        | 1.3±0.1 <sup>‡</sup>         |

- ‡ p<0.05 TAC versus sham at the same time point  
\* p<0.01 TAC versus sham at the same time point  
◇ p<0.001 TAC versus sham at the same time point  
‡ p<0.05 TAC basal versus TAC at each time point  
§ p<0.01 TAC basal versus TAC at each time point  
# p<0.001 TAC basal versus TAC at each time point

Supplementary Table 1: Hemodynamic parameters for TAC- or sham-operated mice at 1, 3 and 4 weeks post-operation

|                 | Sham        |                        |                         |                         |             |                        |                         |                         | TAC         |                       |                         |                        |              |                        |                         |                         |
|-----------------|-------------|------------------------|-------------------------|-------------------------|-------------|------------------------|-------------------------|-------------------------|-------------|-----------------------|-------------------------|------------------------|--------------|------------------------|-------------------------|-------------------------|
|                 | Abatacept   |                        |                         |                         | PBS         |                        |                         |                         | Abatacept   |                       |                         |                        | PBS          |                        |                         |                         |
|                 | Basal (n=8) | 1 week post-sham (n=7) | 3 weeks post-sham (n=8) | 4 weeks post-sham (n=8) | Basal (n=8) | 1 week post-sham (n=5) | 3 weeks post-sham (n=7) | 4 weeks post-sham (n=7) | Basal (n=9) | 1 week post-TAC (n=8) | 3 weeks post-TAC (n=7)  | 4 weeks post-TAC (n=7) | Basal (n=10) | 1 week post-TAC (n=10) | 3 weeks post-TAC (n=10) | 4 weeks post-TAC (n=10) |
| Age (wks)       | 9.0±0.3     | 9.9±0.0                | 12.0±0.0                | 12.9±0.0                | 9±0.3       | 10.1±0.0               | 12.0±0.1                | 13.0±0.0                | 8.9±0.0     | 9.9±0.0               | 11.9±0.0                | 12.9±0.0               | 9.0±0.3      | 10.1±0.0               | 12.1±0.0                | 12.9±0.0                |
| Weight (g)      | 22.6±1.4    | 22.1±1.3               | 23.5±1.5                | 23.7±1.7                | 22.6±1.4    | 21.7±1.4               | 23.11±2.1               | 24.0±1.9                | 22.5±1.6    | 22.1±1.4              | 23.4±1.3                | 24±1.8                 | 22.6±1.4     | 21.6±1.8               | 23.6±1.6                | 24.2±1.4                |
| HR M-mode (bpm) | 564.4±75.8  | 514.0±56.4             | 602.8±68.6              | 614.4±44.5              | 564.4±75.8  | 579.0±18.9             | 577.3±69.9              | 575.2±85.6              | 556.9±86.1  | 546.6±55.8            | 597.9±94.6              | 561.4±66.0             | 564.4±75.8   | 544.7±46.2             | 575.2±85.6              | 558.3±60.9              |
| %FS             | 41.4±3.8    | 43.0±4.1               | 42.6±1.5                | 40.7±2.0                | 41.4±3.8    | 43.3±2.5               | 40.6±2.5                | 41.4±1.7                | 42.0±1.5    | 41.3±3.2*             | 37.3±1.6* <sup>⊗</sup>  | 36.5±3.7*              | 41.4±3.8     | 34.9±1.3 <sup>◇</sup>  | 30.7±3.0 <sup>◇</sup>   | 27.5±3.8 <sup>◇</sup>   |
| %EF             | 73.2±4.8    | 75.2±4.8               | 74.9±1.6                | 72.8±2.4                | 73.2±4.8    | 75.8±2.6               | 72.7±3                  | 73.8±1.9                | 74.1±1.8    | 73.4±3.9 <sup>§</sup> | 68.3±2.2 <sup>§</sup> # | 67.2±4.8*              | 73.2±4.8     | 65.2±1.8 <sup>◇</sup>  | 58.9±4.6 <sup>◇</sup>   | 53.9±6.2 <sup>◇</sup>   |
| LVIDd (mm)      | 3.4±0.1     | 3.3±0.2                | 3.3±0.2                 | 3.2±0.2                 | 3.4±0.1     | 3.1±0.2                | 3.2±0.1                 | 3.1±0.3                 | 3.4±0.1     | 3.3±0.2               | 3.5±0.2 <sup>†</sup> ⊙  | 3.5±0.1*               | 3.4±0.1      | 3.5±0.2 <sup>+</sup>   | 3.8±0.3 <sup>◇</sup>    | 3.8±0.2 <sup>◇</sup>    |
| LVIDs (mm)      | 2±0.2       | 1.9±0.2                | 1.9±0.1                 | 1.9±0.1                 | 2.0±0.2     | 1.8±0.1                | 1.9±0.1                 | 1.8±0.2                 | 1.9±0.1     | 1.9±0.2*              | 2.2±0.2* <sup>⊗</sup>   | 2.2±0.2* <sup>⊙</sup>  | 2.0±0.2      | 2.3±0.1 <sup>◇</sup>   | 2.6±0.3 <sup>◇</sup>    | 2.8±0.3 <sup>◇</sup>    |
| IVSd (mm)       | 0.8±0.0     | 0.7±0.1                | 0.8±0.0                 | 0.8±0.0                 | 0.8±0.0     | 0.8±0.1                | 0.8±0.0                 | 0.8±0.0                 | 0.8±0.1     | 0.9±0.1 <sup>#</sup>  | 0.9±0.1 <sup>⊙</sup>    | 1.0±0.0 <sup>#</sup>   | 0.8±0.0      | 0.9±0.1                | 0.9±0.1 <sup>+</sup>    | 1.0±0.1 <sup>◇</sup>    |
| IVSs (mm)       | 1.2±0.1     | 1.2±0.0                | 1.3±0.0                 | 1.2±0.0                 | 1.2±0.1     | 1.3±0.1                | 1.2±0.1                 | 1.2±0.1                 | 1.2±0.1     | 1.3±0.0 <sup>#</sup>  | 1.3±0.1                 | 1.4±0.0 <sup>#</sup>   | 1.2±0.1      | 1.3±0.1                | 1.4±0.1 <sup>▲</sup>    | 1.3±0.1                 |
| LVPWd (mm)      | 0.8±0.1     | 0.8±0.1                | 0.8±0.1                 | 0.8±0.0                 | 0.8±0.1     | 0.8±0.0                | 0.8±0.1                 | 0.9±0.1                 | 0.7±0.1     | 0.9±0.1 <sup>#</sup>  | 1±0.1 <sup>#</sup>      | 0.9±0.0 <sup>#</sup>   | 0.8±0.1      | 0.9±0.1 <sup>◇</sup>   | 1.0±0.1 <sup>◇</sup>    | 1.0±0.1 <sup>◇</sup>    |
| LVPWs (mm)      | 1.2±0.0     | 1.3±0.0                | 1.2±0.1                 | 1.2±0.1                 | 1.2±0.0     | 1.2±0.0                | 1.2±0.0                 | 1.2±0.0                 | 1.2±0.1     | 1.4±0.1 <sup>#</sup>  | 1.4±0.1 <sup>#</sup>    | 1.4±0.0 <sup>#</sup>   | 1.2±0.0      | 1.4±0.1 <sup>◇</sup>   | 1.4±0.0 <sup>◇</sup>    | 1.4±0.1 <sup>◇</sup>    |

<sup>‡</sup>p<0.05 TAC abatacept versus TAC PBS  
<sup>§</sup>p<0.01 TAC abatacept versus TAC PBS  
<sup>\*</sup>p<0.001 TAC abatacept versus TAC PBS  
<sup>⊙</sup>p<0.05 TAC abatacept versus sham abatacept  
<sup>⊗</sup>p<0.01 TAC abatacept versus sham abatacept  
<sup>#</sup>p<0.001 TAC abatacept versus sham abatacept  
<sup>▲</sup>p<0.05 TAC PBS versus sham PBS  
<sup>+</sup>p<0.01 TAC PBS versus sham PBS  
<sup>◇</sup>p<0.001 TAC PBS versus sham PBS

Supplementary Table 2: Hemodynamic parameters for TAC- or sham-operated mice treated with abatacept or PBS, at 1, 3 and 4 weeks post-operation



| <b>Gene</b>                                     | <b>Forward</b>                 | <b>Reverse</b>                   |
|-------------------------------------------------|--------------------------------|----------------------------------|
| <b><math>\beta</math>-Myosin (<i>Mhy7</i>)</b>  | 5'-CGCATCAAGGAGCTCACC-3'       | 5'-CTGCAGCCGCAGTAGGTT-3'         |
| <b>Brain Natriuretic Peptide (<i>Nppb</i>)</b>  | 5'-GTCAGTCGTTGGGCTGTAAC-3'     | 5'-AGACCCAGGCAGAGTCAGAA-3'       |
| <b>Atrial Natriuretic Peptide (<i>Nppa</i>)</b> | 5'-CACAGATCTGATGGATTCAAGA-3'   | 5'-CCTCATCTTCTACCGGCATC-3'       |
| <b>18S Ribosomal RNA (18S)</b>                  | 5'-AAATCAGTTATGGTTCCTTTGGTC-3' | 5'-GCTCTAGAATTACCACAGTTATCCAA-3' |

**Supplementary Table 3 : List of primers used.**
